# Supplementary material
Source: publisher figshare collection journal article supplement (https://acs.figshare.com/ndownloader/files/3827014)
Supplement: Supplementary file 1 [file 3827014]

 
data_mccnitro_fm3m_sqz 
 
_audit_creation_method            SHELXL-97 
_chemical_name_systematic 
; 
 ? 
; 
_chemical_name_common             ? 
_chemical_melting_point           ? 
_chemical_formula_moiety          ? 
_chemical_formula_sum 
 'C156 O32 Zr6' 
_chemical_formula_weight          2932.88 
 
loop_ 
 _atom_type_symbol 
 _atom_type_description 
 _atom_type_scat_dispersion_real 
 _atom_type_scat_dispersion_imag 
 _atom_type_scat_source 
 'C'  'C'  -0.0001   0.0005 
 'International Tables Vol C Tables 4.2.6.8 and 6.1.1.4' 
 'O'  'O'   0.0017   0.0018 
 'International Tables Vol C Tables 4.2.6.8 and 6.1.1.4' 
 'Zr'  'Zr'   0.1626   1.5743 
 'International Tables Vol C Tables 4.2.6.8 and 6.1.1.4' 
 
_symmetry_cell_setting            'cubic' 
_symmetry_space_group_name_H-M    'F m -3 m' 
 
loop_ 
 _symmetry_equiv_pos_as_xyz 
 'x, y, z' 
 '-y, x, z' 
 '-x, -y, z' 
 'y, -x, z' 
 'x, -y, -z' 
 'y, x, -z' 
 '-x, y, -z' 
 '-y, -x, -z' 
 'z, x, y' 
 '-x, z, y' 
 '-z, -x, y' 
 'x, -z, y' 
 'z, -x, -y' 
 'x, z, -y' 
 '-z, x, -y' 
 '-x, -z, -y' 
 'y, z, x' 
 '-z, -y, -x' 
 '-z, y, x' 
 'z, y, -x' 
 'z, -y, x' 
 'y, -z, -x' 
 '-y, -z, x' 
 '-y, z, -x' 
 'x, y+1/2, z+1/2' 
 '-y, x+1/2, z+1/2' 
 '-x, -y+1/2, z+1/2' 
 'y, -x+1/2, z+1/2' 
 'x, -y+1/2, -z+1/2' 
 'y, x+1/2, -z+1/2' 
 '-x, y+1/2, -z+1/2' 
 '-y, -x+1/2, -z+1/2' 
 'z, x+1/2, y+1/2' 
 '-x, z+1/2, y+1/2' 
 '-z, -x+1/2, y+1/2' 
 'x, -z+1/2, y+1/2' 
 'z, -x+1/2, -y+1/2' 
 'x, z+1/2, -y+1/2' 
 '-z, x+1/2, -y+1/2' 
 '-x, -z+1/2, -y+1/2' 
 'y, z+1/2, x+1/2' 
 '-z, -y+1/2, -x+1/2' 
 '-z, y+1/2, x+1/2' 
 'z, y+1/2, -x+1/2' 
 'z, -y+1/2, x+1/2' 
 'y, -z+1/2, -x+1/2' 
 '-y, -z+1/2, x+1/2' 
 '-y, z+1/2, -x+1/2' 
 'x+1/2, y, z+1/2' 
 '-y+1/2, x, z+1/2' 
 '-x+1/2, -y, z+1/2' 
 'y+1/2, -x, z+1/2' 
 'x+1/2, -y, -z+1/2' 
 'y+1/2, x, -z+1/2' 
 '-x+1/2, y, -z+1/2' 
 '-y+1/2, -x, -z+1/2' 
 'z+1/2, x, y+1/2' 
 '-x+1/2, z, y+1/2' 
 '-z+1/2, -x, y+1/2' 
 'x+1/2, -z, y+1/2' 
 'z+1/2, -x, -y+1/2' 
 'x+1/2, z, -y+1/2' 
 '-z+1/2, x, -y+1/2' 
 '-x+1/2, -z, -y+1/2' 
 'y+1/2, z, x+1/2' 
 '-z+1/2, -y, -x+1/2' 
 '-z+1/2, y, x+1/2' 
 'z+1/2, y, -x+1/2' 
 'z+1/2, -y, x+1/2' 
 'y+1/2, -z, -x+1/2' 
 '-y+1/2, -z, x+1/2' 
 '-y+1/2, z, -x+1/2' 
 'x+1/2, y+1/2, z' 
 '-y+1/2, x+1/2, z' 
 '-x+1/2, -y+1/2, z' 
 'y+1/2, -x+1/2, z' 
 'x+1/2, -y+1/2, -z' 
 'y+1/2, x+1/2, -z' 
 '-x+1/2, y+1/2, -z' 
 '-y+1/2, -x+1/2, -z' 
 'z+1/2, x+1/2, y' 
 '-x+1/2, z+1/2, y' 
 '-z+1/2, -x+1/2, y' 
 'x+1/2, -z+1/2, y' 
 'z+1/2, -x+1/2, -y' 
 'x+1/2, z+1/2, -y' 
 '-z+1/2, x+1/2, -y' 
 '-x+1/2, -z+1/2, -y' 
 'y+1/2, z+1/2, x' 
 '-z+1/2, -y+1/2, -x' 
 '-z+1/2, y+1/2, x' 
 'z+1/2, y+1/2, -x' 
 'z+1/2, -y+1/2, x' 
 'y+1/2, -z+1/2, -x' 
 '-y+1/2, -z+1/2, x' 
 '-y+1/2, z+1/2, -x' 
 '-x, -y, -z' 
 'y, -x, -z' 
 'x, y, -z' 
 '-y, x, -z' 
 '-x, y, z' 
 '-y, -x, z' 
 'x, -y, z' 
 'y, x, z' 
 '-z, -x, -y' 
 'x, -z, -y' 
 'z, x, -y' 
 '-x, z, -y' 
 '-z, x, y' 
 '-x, -z, y' 
 'z, -x, y' 
 'x, z, y' 
 '-y, -z, -x' 
 'z, y, x' 
 'z, -y, -x' 
 '-z, -y, x' 
 '-z, y, -x' 
 '-y, z, x' 
 'y, z, -x' 
 'y, -z, x' 
 '-x, -y+1/2, -z+1/2' 
 'y, -x+1/2, -z+1/2' 
 'x, y+1/2, -z+1/2' 
 '-y, x+1/2, -z+1/2' 
 '-x, y+1/2, z+1/2' 
 '-y, -x+1/2, z+1/2' 
 'x, -y+1/2, z+1/2' 
 'y, x+1/2, z+1/2' 
 '-z, -x+1/2, -y+1/2' 
 'x, -z+1/2, -y+1/2' 
 'z, x+1/2, -y+1/2' 
 '-x, z+1/2, -y+1/2' 
 '-z, x+1/2, y+1/2' 
 '-x, -z+1/2, y+1/2' 
 'z, -x+1/2, y+1/2' 
 'x, z+1/2, y+1/2' 
 '-y, -z+1/2, -x+1/2' 
 'z, y+1/2, x+1/2' 
 'z, -y+1/2, -x+1/2' 
 '-z, -y+1/2, x+1/2' 
 '-z, y+1/2, -x+1/2' 
 '-y, z+1/2, x+1/2' 
 'y, z+1/2, -x+1/2' 
 'y, -z+1/2, x+1/2' 
 '-x+1/2, -y, -z+1/2' 
 'y+1/2, -x, -z+1/2' 
 'x+1/2, y, -z+1/2' 
 '-y+1/2, x, -z+1/2' 
 '-x+1/2, y, z+1/2' 
 '-y+1/2, -x, z+1/2' 
 'x+1/2, -y, z+1/2' 
 'y+1/2, x, z+1/2' 
 '-z+1/2, -x, -y+1/2' 
 'x+1/2, -z, -y+1/2' 
 'z+1/2, x, -y+1/2' 
 '-x+1/2, z, -y+1/2' 
 '-z+1/2, x, y+1/2' 
 '-x+1/2, -z, y+1/2' 
 'z+1/2, -x, y+1/2' 
 'x+1/2, z, y+1/2' 
 '-y+1/2, -z, -x+1/2' 
 'z+1/2, y, x+1/2' 
 'z+1/2, -y, -x+1/2' 
 '-z+1/2, -y, x+1/2' 
 '-z+1/2, y, -x+1/2' 
 '-y+1/2, z, x+1/2' 
 'y+1/2, z, -x+1/2' 
 'y+1/2, -z, x+1/2' 
 '-x+1/2, -y+1/2, -z' 
 'y+1/2, -x+1/2, -z' 
 'x+1/2, y+1/2, -z' 
 '-y+1/2, x+1/2, -z' 
 '-x+1/2, y+1/2, z' 
 '-y+1/2, -x+1/2, z' 
 'x+1/2, -y+1/2, z' 
 'y+1/2, x+1/2, z' 
 '-z+1/2, -x+1/2, -y' 
 'x+1/2, -z+1/2, -y' 
 'z+1/2, x+1/2, -y' 
 '-x+1/2, z+1/2, -y' 
 '-z+1/2, x+1/2, y' 
 '-x+1/2, -z+1/2, y' 
 'z+1/2, -x+1/2, y' 
 'x+1/2, z+1/2, y' 
 '-y+1/2, -z+1/2, -x' 
 'z+1/2, y+1/2, x' 
 'z+1/2, -y+1/2, -x' 
 '-z+1/2, -y+1/2, x' 
 '-z+1/2, y+1/2, -x' 
 '-y+1/2, z+1/2, x' 
 'y+1/2, z+1/2, -x' 
 'y+1/2, -z+1/2, x' 
 
_cell_length_a                    38.678(3) 
_cell_length_b                    38.678(3) 
_cell_length_c                    38.678(3) 
_cell_angle_alpha                 90.00 
_cell_angle_beta                  90.00 
_cell_angle_gamma                 90.00 
_cell_volume                      57862(8) 
_cell_formula_units_Z             4 
_cell_measurement_temperature     293(2) 
_cell_measurement_reflns_used     ? 
_cell_measurement_theta_min       ? 
_cell_measurement_theta_max       ? 
 
_exptl_crystal_description        ? 
_exptl_crystal_colour             ? 
_exptl_crystal_size_max           ? 
_exptl_crystal_size_mid           ? 
_exptl_crystal_size_min           ? 
_exptl_crystal_density_meas       ? 
_exptl_crystal_density_diffrn     0.337 
_exptl_crystal_density_method     'not measured' 
_exptl_crystal_F_000              5728 
_exptl_absorpt_coefficient_mu     0.154 
_exptl_absorpt_correction_type    ? 
_exptl_absorpt_correction_T_min   ? 
_exptl_absorpt_correction_T_max   ? 
_exptl_absorpt_process_details    ? 
 
_exptl_special_details 
; 
 ? 
; 
 
_diffrn_ambient_temperature       293(2) 
_diffrn_radiation_wavelength      0.41328 
_diffrn_radiation_type            ? 
_diffrn_radiation_source          'fine-focus sealed tube' 
_diffrn_radiation_monochromator   graphite 
_diffrn_measurement_device_type   ? 
_diffrn_measurement_method        ? 
_diffrn_detector_area_resol_mean  ? 
_diffrn_reflns_number             67300 
_diffrn_reflns_av_R_equivalents   0.1469 
_diffrn_reflns_av_sigmaI/netI     0.0219 
_diffrn_reflns_limit_h_min        -32 
_diffrn_reflns_limit_h_max        32 
_diffrn_reflns_limit_k_min        -32 
_diffrn_reflns_limit_k_max        32 
_diffrn_reflns_limit_l_min        -32 
_diffrn_reflns_limit_l_max        32 
_diffrn_reflns_theta_min          0.87 
_diffrn_reflns_theta_max          10.15 
_reflns_number_total              998 
_reflns_number_gt                 951 
_reflns_threshold_expression      >2sigma(I) 
 
_computing_data_collection        ? 
_computing_cell_refinement        ? 
_computing_data_reduction         ? 
_computing_structure_solution     'SHELXS-97 (Sheldrick, 2008)' 
_computing_structure_refinement   'SHELXL-97 (Sheldrick, 2008)' 
_computing_molecular_graphics     ? 
_computing_publication_material   ? 
 
_refine_special_details 
; 
 Refinement of F^2^ against ALL reflections.  The weighted R-factor wR and 
 goodness of fit S are based on F^2^, conventional R-factors R are based 
 on F, with F set to zero for negative F^2^. The threshold expression of 
 F^2^ > 2sigma(F^2^) is used only for calculating R-factors(gt) etc. and is 
 not relevant to the choice of reflections for refinement.  R-factors based 
 on F^2^ are statistically about twice as large as those based on F, and R- 
 factors based on ALL data will be even larger. 
; 
 
_refine_ls_structure_factor_coef  Fsqd  
_refine_ls_matrix_type            full 
_refine_ls_weighting_scheme       calc  
_refine_ls_weighting_details 
 'calc w=1/[\s^2^(Fo^2^)+(0.1000P)^2^+0.0000P] where P=(Fo^2^+2Fc^2^)/3' 
_atom_sites_solution_primary      direct 
_atom_sites_solution_secondary    difmap 
_atom_sites_solution_hydrogens    none 
_refine_ls_hydrogen_treatment     none 
_refine_ls_extinction_method      none 
_refine_ls_extinction_coef        ? 
_refine_ls_number_reflns          998 
_refine_ls_number_parameters      41 
_refine_ls_number_restraints      34 
_refine_ls_R_factor_all           0.1178 
_refine_ls_R_factor_gt            0.1126 
_refine_ls_wR_factor_ref          0.2798 
_refine_ls_wR_factor_gt           0.2766 
_refine_ls_goodness_of_fit_ref    2.243 
_refine_ls_restrained_S_all       2.328 
_refine_ls_shift/su_max           0.001 
_refine_ls_shift/su_mean          0.000 
 
loop_ 
 _atom_site_label 
 _atom_site_type_symbol 
 _atom_site_fract_x 
 _atom_site_fract_y 
 _atom_site_fract_z 
 _atom_site_U_iso_or_equiv 
 _atom_site_adp_type 
 _atom_site_occupancy 
 _atom_site_symmetry_multiplicity 
 _atom_site_calc_flag 
 _atom_site_refinement_flags 
 _atom_site_disorder_assembly 
 _atom_site_disorder_group 
Zr1 Zr 0.43616(4) 0.0000 0.0000 0.0713(14) Uani 1 8 d SU . . 
O1 O 0.4687(2) 0.0313(2) 0.0313(2) 0.101(5) Uani 1 6 d SU . . 
O2 O 0.4153(3) 0.0000 0.0401(3) 0.180(4) Uani 1 2 d SU . . 
C1 C 0.4201(4) 0.0000 0.0799(4) 0.203(9) Uani 1 4 d SDU . . 
C5 C 0.3949(4) 0.0000 0.1051(4) 0.203(11) Uiso 1 4 d SDU . . 
C2 C 0.3629(5) 0.0122(8) 0.0941(8) 0.280(17) Uiso 0.50 1 d PDU . . 
C3 C 0.3381(9) 0.0121(10) 0.1201(10) 0.34(2) Uiso 0.50 1 d PDU . . 
C4 C 0.3471(16) 0.0000 0.1529(16) 0.45(3) Uiso 1 4 d SDU . . 
C8 C 0.3216(16) 0.0000 0.1784(16) 0.43(2) Uiso 1 4 d SDU . . 
C9 C 0.3240(14) -0.0173(12) 0.2098(12) 0.45(3) Uiso 0.50 1 d PDU . . 
C10 C 0.3012(8) -0.0187(10) 0.2376(14) 0.47(3) Uiso 0.50 1 d PDU . . 
C11 C 0.2720(13) 0.0000 0.2280(13) 0.51(4) Uiso 1 4 d SDU . . 
 
loop_ 
 _atom_site_aniso_label 
 _atom_site_aniso_U_11 
 _atom_site_aniso_U_22 
 _atom_site_aniso_U_33 
 _atom_site_aniso_U_23 
 _atom_site_aniso_U_13 
 _atom_site_aniso_U_12 
Zr1 0.0445(17) 0.0847(16) 0.0847(16) 0.000 0.000 0.000 
O1 0.101(5) 0.101(5) 0.101(5) 0.035(6) -0.035(6) -0.035(6) 
O2 0.137(8) 0.204(11) 0.198(9) 0.000 0.076(8) 0.000 
C1 0.170(9) 0.27(2) 0.170(9) 0.000 0.157(14) 0.000 
 
_geom_special_details 
; 
 All esds (except the esd in the dihedral angle between two l.s. planes) 
 are estimated using the full covariance matrix.  The cell esds are taken 
 into account individually in the estimation of esds in distances, angles 
 and torsion angles; correlations between esds in cell parameters are only 
 used when they are defined by crystal symmetry.  An approximate (isotropic) 
 treatment of cell esds is used for estimating esds involving l.s. planes. 
; 
 
loop_ 
 _geom_bond_atom_site_label_1 
 _geom_bond_atom_site_label_2 
 _geom_bond_distance 
 _geom_bond_site_symmetry_2 
 _geom_bond_publ_flag 
Zr1 O2 1.748(12) . ? 
Zr1 O2 1.748(12) 106 ? 
Zr1 O2 1.748(12) 99 ? 
Zr1 O2 1.748(12) 14 ? 
Zr1 O1 2.125(5) . ? 
Zr1 O1 2.125(5) 99 ? 
Zr1 O1 2.125(5) 172_545 ? 
Zr1 O1 2.125(5) 74_545 ? 
Zr1 Zr1 3.492(2) 170 ? 
Zr1 Zr1 3.492(2) 161 ? 
Zr1 Zr1 3.492(2) 74_545 ? 
Zr1 Zr1 3.492(2) 65_554 ? 
O1 Zr1 2.125(5) 161 ? 
O1 Zr1 2.125(5) 170 ? 
O2 C1 1.550(16) . ? 
C1 C5 1.380(10) . ? 
C1 O2 1.550(16) 66 ? 
C5 C2 1.391(5) . ? 
C5 C2 1.391(5) 165 ? 
C5 C2 1.391(5) 103 ? 
C5 C2 1.391(5) 66 ? 
C2 C2 0.94(6) 103 ? 
C2 C3 1.392(5) . ? 
C2 C3 1.68(4) 103 ? 
C3 C3 0.93(8) 103 ? 
C3 C4 1.394(5) . ? 
C3 C2 1.68(4) 103 ? 
C4 C3 1.394(5) 103 ? 
C4 C3 1.394(5) 165 ? 
C4 C3 1.394(5) 66 ? 
C4 C8 1.395(11) . ? 
C8 C9 1.391(5) . ? 
C8 C9 1.391(5) 165 ? 
C8 C9 1.391(5) 103 ? 
C8 C9 1.391(5) 66 ? 
C9 C9 1.34(9) 103 ? 
C9 C10 1.391(5) . ? 
C9 C9 1.85(10) 165 ? 
C9 C10 1.97(5) 103 ? 
C10 C11 1.392(5) . ? 
C10 C10 1.45(8) 103 ? 
C10 C9 1.97(5) 103 ? 
C11 C10 1.392(5) 165 ? 
C11 C10 1.392(5) 103 ? 
C11 C10 1.392(5) 66 ? 
 
loop_ 
 _geom_angle_atom_site_label_1 
 _geom_angle_atom_site_label_2 
 _geom_angle_atom_site_label_3 
 _geom_angle 
 _geom_angle_site_symmetry_1 
 _geom_angle_site_symmetry_3 
 _geom_angle_publ_flag 
O2 Zr1 O2 77.7(4) . 106 ? 
O2 Zr1 O2 125.0(9) . 99 ? 
O2 Zr1 O2 77.7(4) 106 99 ? 
O2 Zr1 O2 77.7(4) . 14 ? 
O2 Zr1 O2 125.0(9) 106 14 ? 
O2 Zr1 O2 77.7(4) 99 14 ? 
O2 Zr1 O1 76.6(4) . . ? 
O2 Zr1 O1 141.15(18) 106 . ? 
O2 Zr1 O1 141.15(18) 99 . ? 
O2 Zr1 O1 76.6(4) 14 . ? 
O2 Zr1 O1 141.15(18) . 99 ? 
O2 Zr1 O1 141.15(18) 106 99 ? 
O2 Zr1 O1 76.6(4) 99 99 ? 
O2 Zr1 O1 76.6(4) 14 99 ? 
O1 Zr1 O1 69.5(4) . 99 ? 
O2 Zr1 O1 141.15(18) . 172_545 ? 
O2 Zr1 O1 76.6(4) 106 172_545 ? 
O2 Zr1 O1 76.6(4) 99 172_545 ? 
O2 Zr1 O1 141.15(18) 14 172_545 ? 
O1 Zr1 O1 107.4(8) . 172_545 ? 
O1 Zr1 O1 69.5(4) 99 172_545 ? 
O2 Zr1 O1 76.6(4) . 74_545 ? 
O2 Zr1 O1 76.6(4) 106 74_545 ? 
O2 Zr1 O1 141.15(18) 99 74_545 ? 
O2 Zr1 O1 141.15(18) 14 74_545 ? 
O1 Zr1 O1 69.5(4) . 74_545 ? 
O1 Zr1 O1 107.4(8) 99 74_545 ? 
O1 Zr1 O1 69.5(4) 172_545 74_545 ? 
O2 Zr1 Zr1 109.1(3) . 170 ? 
O2 Zr1 Zr1 162.5(4) 106 170 ? 
O2 Zr1 Zr1 109.1(3) 99 170 ? 
O2 Zr1 Zr1 72.5(4) 14 170 ? 
O1 Zr1 Zr1 34.75(18) . 170 ? 
O1 Zr1 Zr1 34.75(18) 99 170 ? 
O1 Zr1 Zr1 89.1(3) 172_545 170 ? 
O1 Zr1 Zr1 89.1(3) 74_545 170 ? 
O2 Zr1 Zr1 72.5(4) . 161 ? 
O2 Zr1 Zr1 109.1(3) 106 161 ? 
O2 Zr1 Zr1 162.5(4) 99 161 ? 
O2 Zr1 Zr1 109.1(3) 14 161 ? 
O1 Zr1 Zr1 34.75(18) . 161 ? 
O1 Zr1 Zr1 89.1(3) 99 161 ? 
O1 Zr1 Zr1 89.1(3) 172_545 161 ? 
O1 Zr1 Zr1 34.75(18) 74_545 161 ? 
Zr1 Zr1 Zr1 60.0 170 161 ? 
O2 Zr1 Zr1 109.1(3) . 74_545 ? 
O2 Zr1 Zr1 72.5(4) 106 74_545 ? 
O2 Zr1 Zr1 109.1(3) 99 74_545 ? 
O2 Zr1 Zr1 162.5(4) 14 74_545 ? 
O1 Zr1 Zr1 89.1(3) . 74_545 ? 
O1 Zr1 Zr1 89.1(3) 99 74_545 ? 
O1 Zr1 Zr1 34.75(18) 172_545 74_545 ? 
O1 Zr1 Zr1 34.75(18) 74_545 74_545 ? 
Zr1 Zr1 Zr1 90.001(1) 170 74_545 ? 
Zr1 Zr1 Zr1 60.0 161 74_545 ? 
O2 Zr1 Zr1 162.5(4) . 65_554 ? 
O2 Zr1 Zr1 109.1(3) 106 65_554 ? 
O2 Zr1 Zr1 72.5(4) 99 65_554 ? 
O2 Zr1 Zr1 109.1(3) 14 65_554 ? 
O1 Zr1 Zr1 89.1(3) . 65_554 ? 
O1 Zr1 Zr1 34.75(18) 99 65_554 ? 
O1 Zr1 Zr1 34.75(18) 172_545 65_554 ? 
O1 Zr1 Zr1 89.1(3) 74_545 65_554 ? 
Zr1 Zr1 Zr1 60.0 170 65_554 ? 
Zr1 Zr1 Zr1 90.001(1) 161 65_554 ? 
Zr1 Zr1 Zr1 60.0 74_545 65_554 ? 
Zr1 O1 Zr1 110.5(4) . 161 ? 
Zr1 O1 Zr1 110.5(4) . 170 ? 
Zr1 O1 Zr1 110.5(4) 161 170 ? 
C1 O2 Zr1 145.6(10) . . ? 
C5 C1 O2 128.1(7) . 66 ? 
C5 C1 O2 128.1(7) . . ? 
O2 C1 O2 103.8(13) 66 . ? 
C1 C5 C2 114.4(17) . . ? 
C1 C5 C2 114.4(17) . 165 ? 
C2 C5 C2 115(3) . 165 ? 
C1 C5 C2 114.4(17) . 103 ? 
C2 C5 C2 40(3) . 103 ? 
C2 C5 C2 131(3) 165 103 ? 
C1 C5 C2 114.4(17) . 66 ? 
C2 C5 C2 131(3) . 66 ? 
C2 C5 C2 40(3) 165 66 ? 
C2 C5 C2 115(3) 103 66 ? 
C2 C2 C5 70.2(14) 103 . ? 
C2 C2 C3 89.7(14) 103 . ? 
C5 C2 C3 113(3) . . ? 
C2 C2 C3 56.0(18) 103 103 ? 
C5 C2 C3 98(3) . 103 ? 
C3 C2 C3 34(2) . 103 ? 
C3 C3 C2 90.2(14) 103 . ? 
C3 C3 C4 70.5(17) 103 . ? 
C2 C3 C4 119(6) . . ? 
C3 C3 C2 56.0(18) 103 103 ? 
C2 C3 C2 34(2) . 103 ? 
C4 C3 C2 102(5) . 103 ? 
C3 C4 C3 125(8) 103 165 ? 
C3 C4 C3 110(6) 103 66 ? 
C3 C4 C3 39(3) 165 66 ? 
C3 C4 C3 39(3) 103 . ? 
C3 C4 C3 110(6) 165 . ? 
C3 C4 C3 125(8) 66 . ? 
C3 C4 C8 118(4) 103 . ? 
C3 C4 C8 118(4) 165 . ? 
C3 C4 C8 118(4) 66 . ? 
C3 C4 C8 118(4) . . ? 
C9 C8 C9 83(5) . 165 ? 
C9 C8 C9 58(4) . 103 ? 
C9 C8 C9 110(8) 165 103 ? 
C9 C8 C9 110(8) . 66 ? 
C9 C8 C9 58(4) 165 66 ? 
C9 C8 C9 83(5) 103 66 ? 
C9 C8 C4 125(4) . . ? 
C9 C8 C4 125(4) 165 . ? 
C9 C8 C4 125(4) 103 . ? 
C9 C8 C4 125(4) 66 . ? 
C9 C9 C8 61(2) 103 . ? 
C9 C9 C10 92.2(19) 103 . ? 
C8 C9 C10 131(7) . . ? 
C9 C9 C9 90.001(7) 103 165 ? 
C8 C9 C9 48(3) . 165 ? 
C10 C9 C9 96(2) . 165 ? 
C9 C9 C10 44.9(15) 103 103 ? 
C8 C9 C10 96(5) . 103 ? 
C10 C9 C10 47(2) . 103 ? 
C9 C9 C10 94.0(17) 165 103 ? 
C9 C10 C11 107(6) . . ? 
C9 C10 C10 87.8(19) . 103 ? 
C11 C10 C10 58.6(19) . 103 ? 
C9 C10 C9 43(3) . 103 ? 
C11 C10 C9 81(5) . 103 ? 
C10 C10 C9 44.9(15) 103 103 ? 
C10 C11 C10 135(8) 165 103 ? 
C10 C11 C10 63(4) 165 66 ? 
C10 C11 C10 99(5) 103 66 ? 
C10 C11 C10 99(5) 165 . ? 
C10 C11 C10 63(4) 103 . ? 
C10 C11 C10 135(8) 66 . ? 
 
_diffrn_measured_fraction_theta_max    0.996 
_diffrn_reflns_theta_full              10.15 
_diffrn_measured_fraction_theta_full   0.996 
_refine_diff_density_max    0.666 
_refine_diff_density_min   -0.612 
_refine_diff_density_rms    0.060 
